# Supplementary material for: The Aspergillus fumigatus CrzA Transcription Factor Activates Chitin Synthase Gene Expression during the Caspofungin Paradoxical Effect
Source: PubMed Central journal article supplement (PMC5472186; doi:10.1128/mbio.00705-17), 2017-06-13

A.

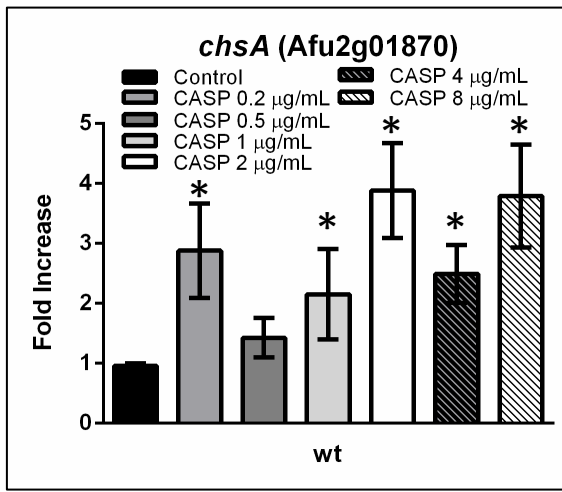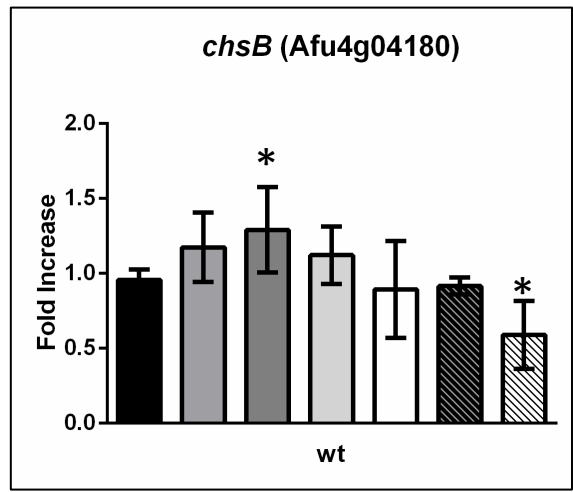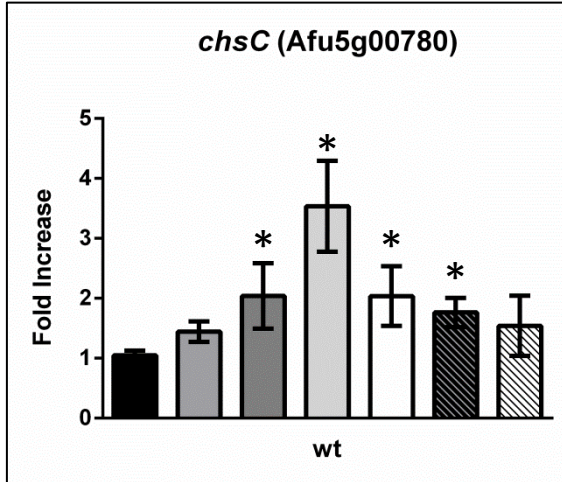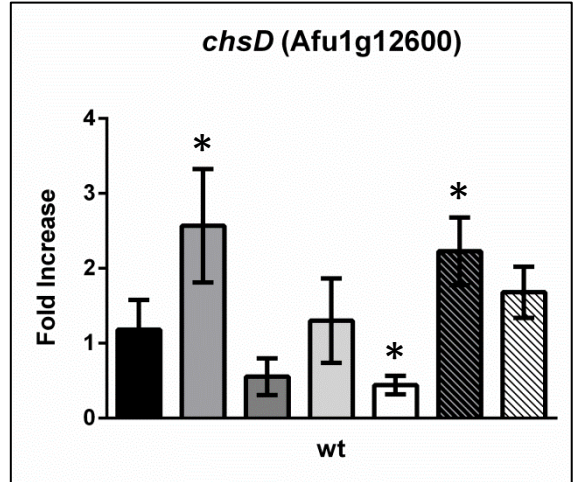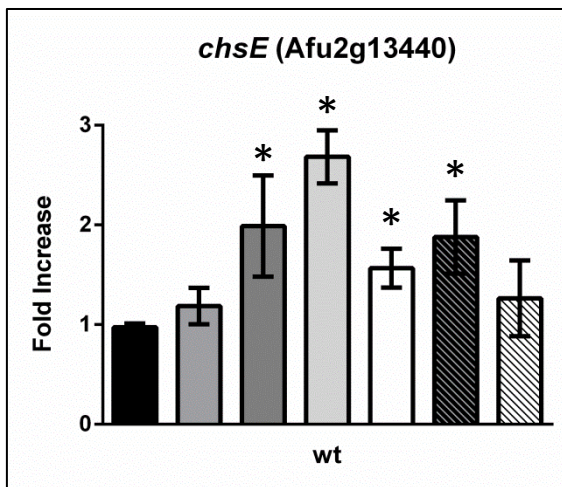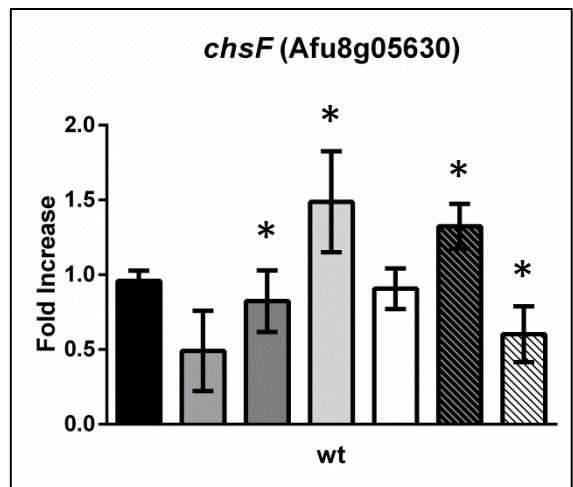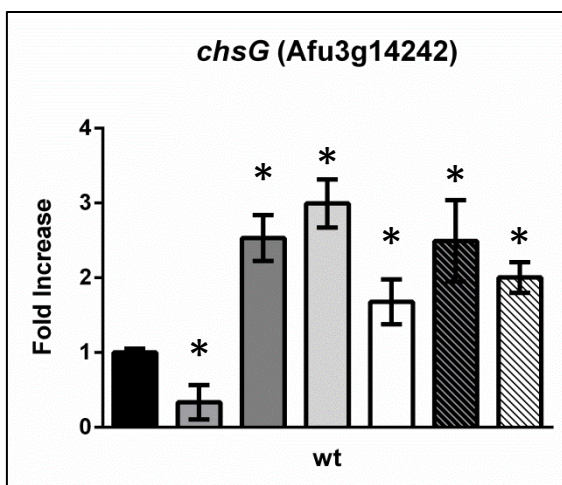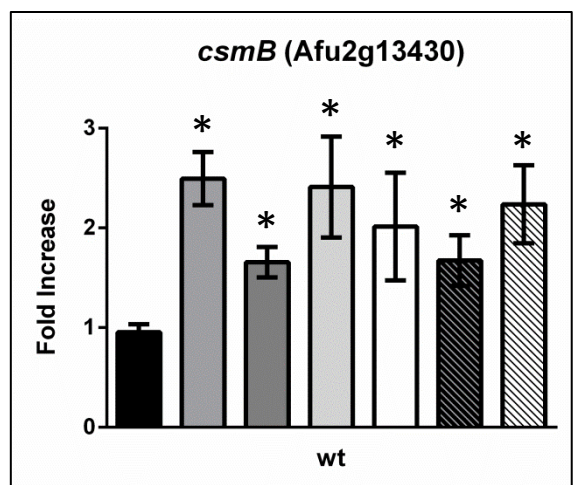

B.

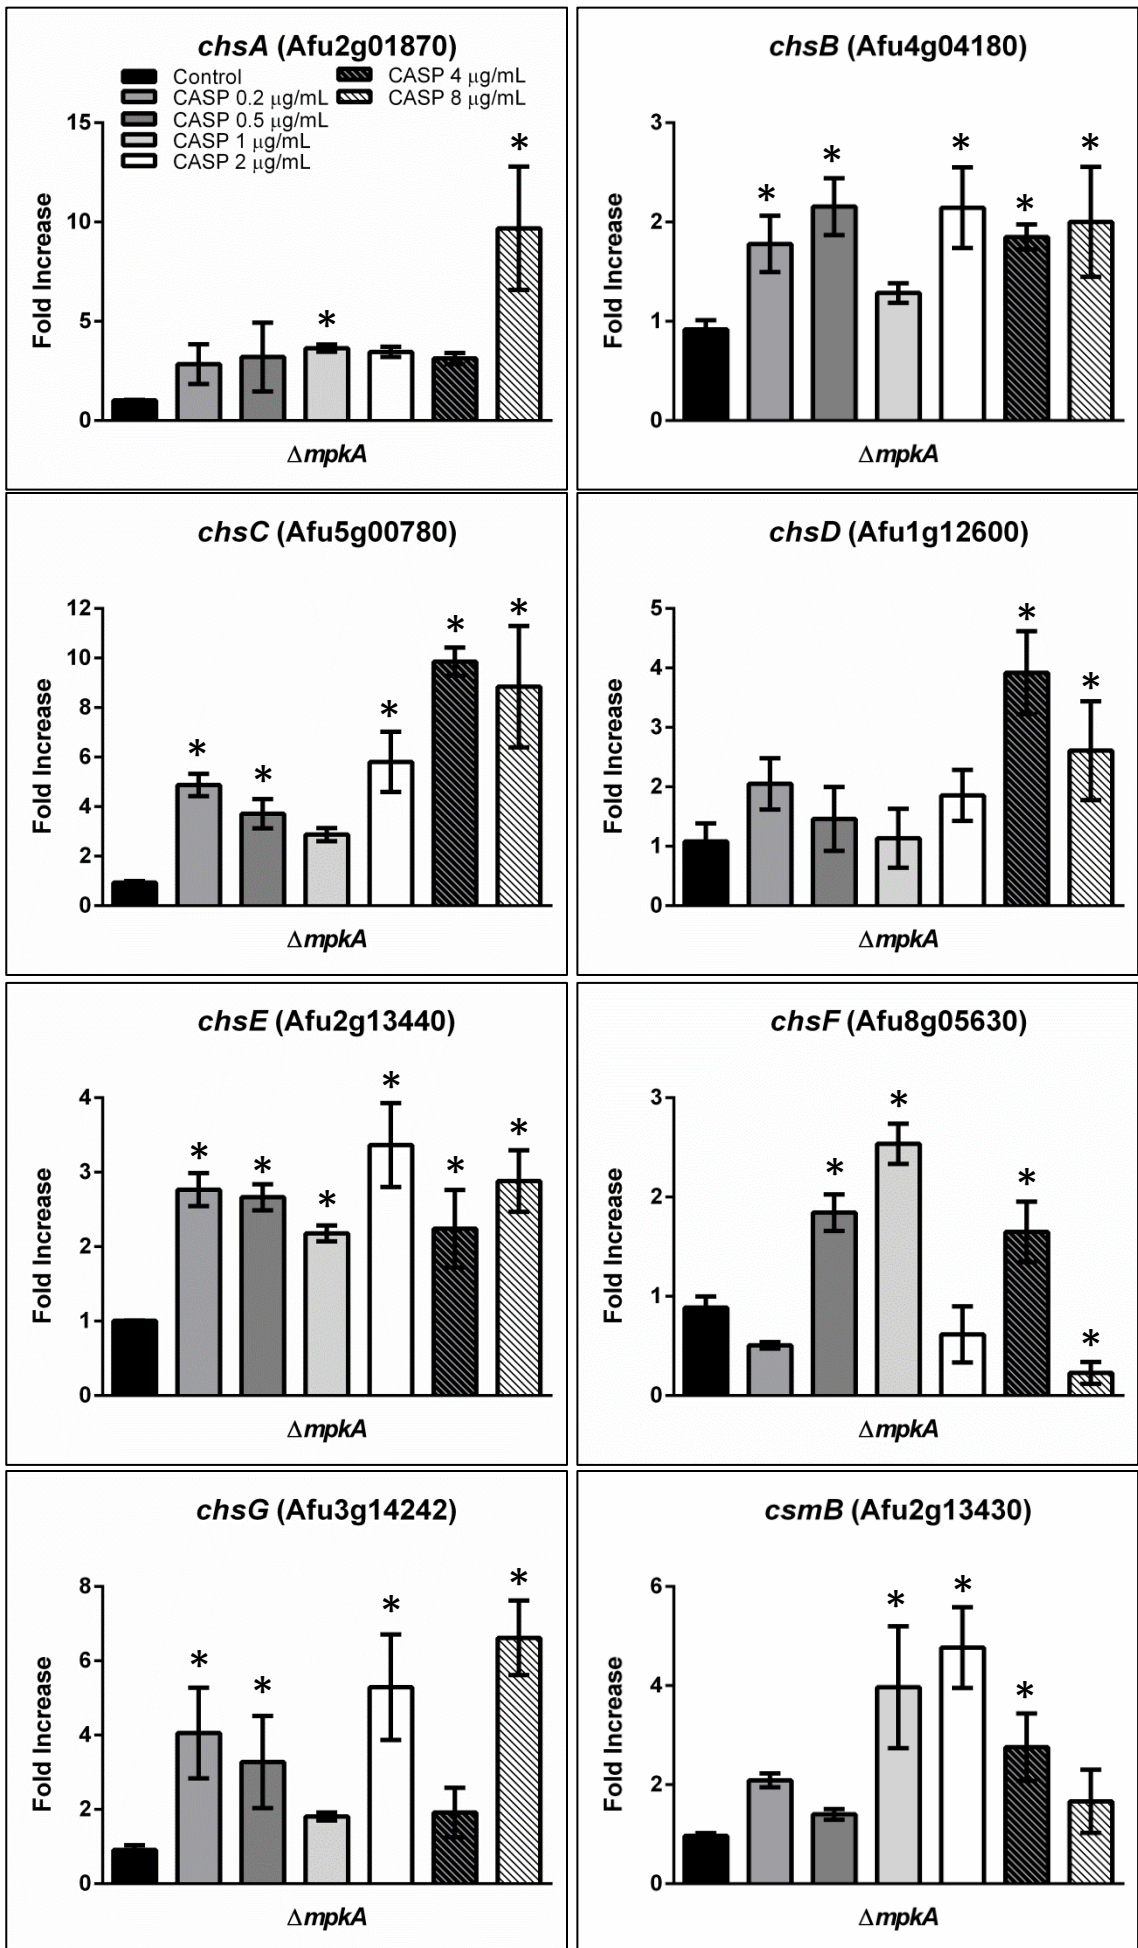



C.

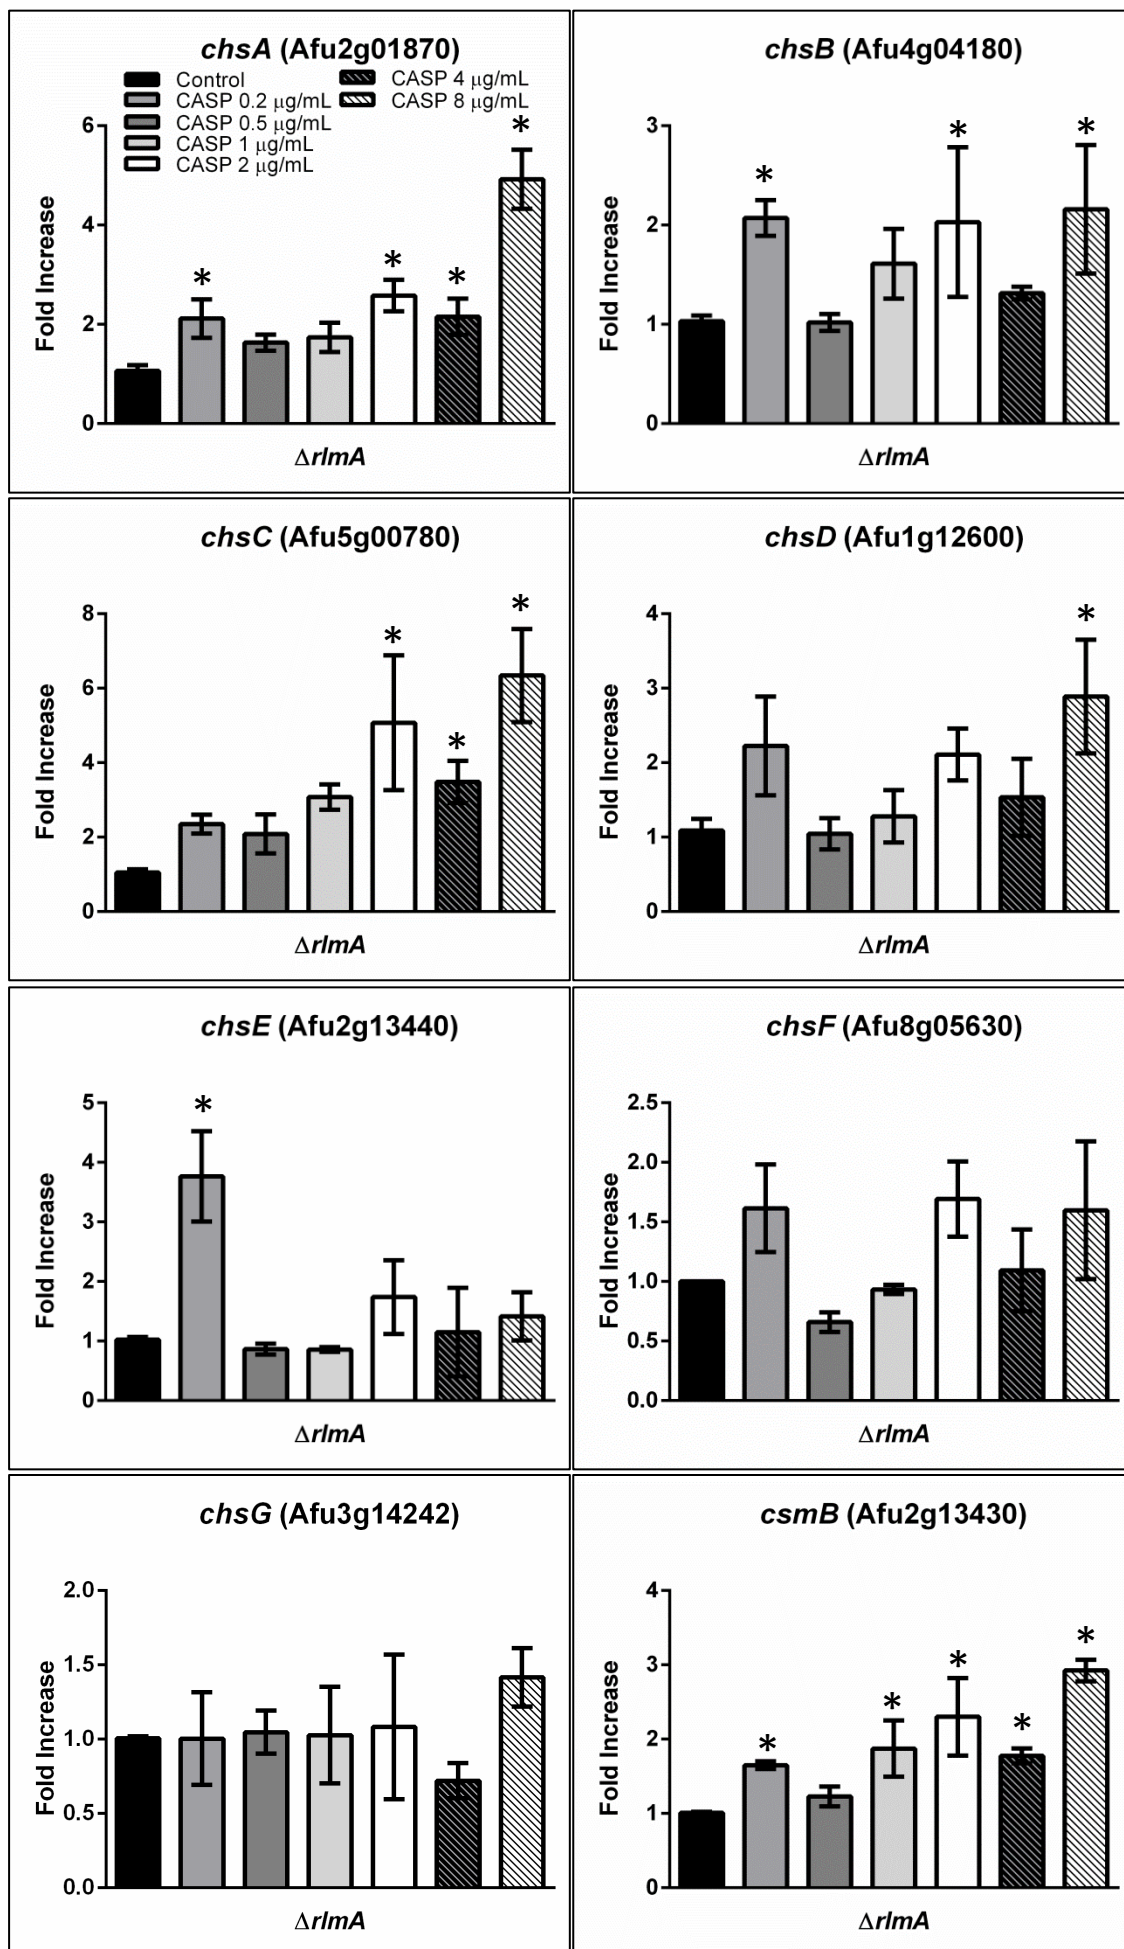

D.

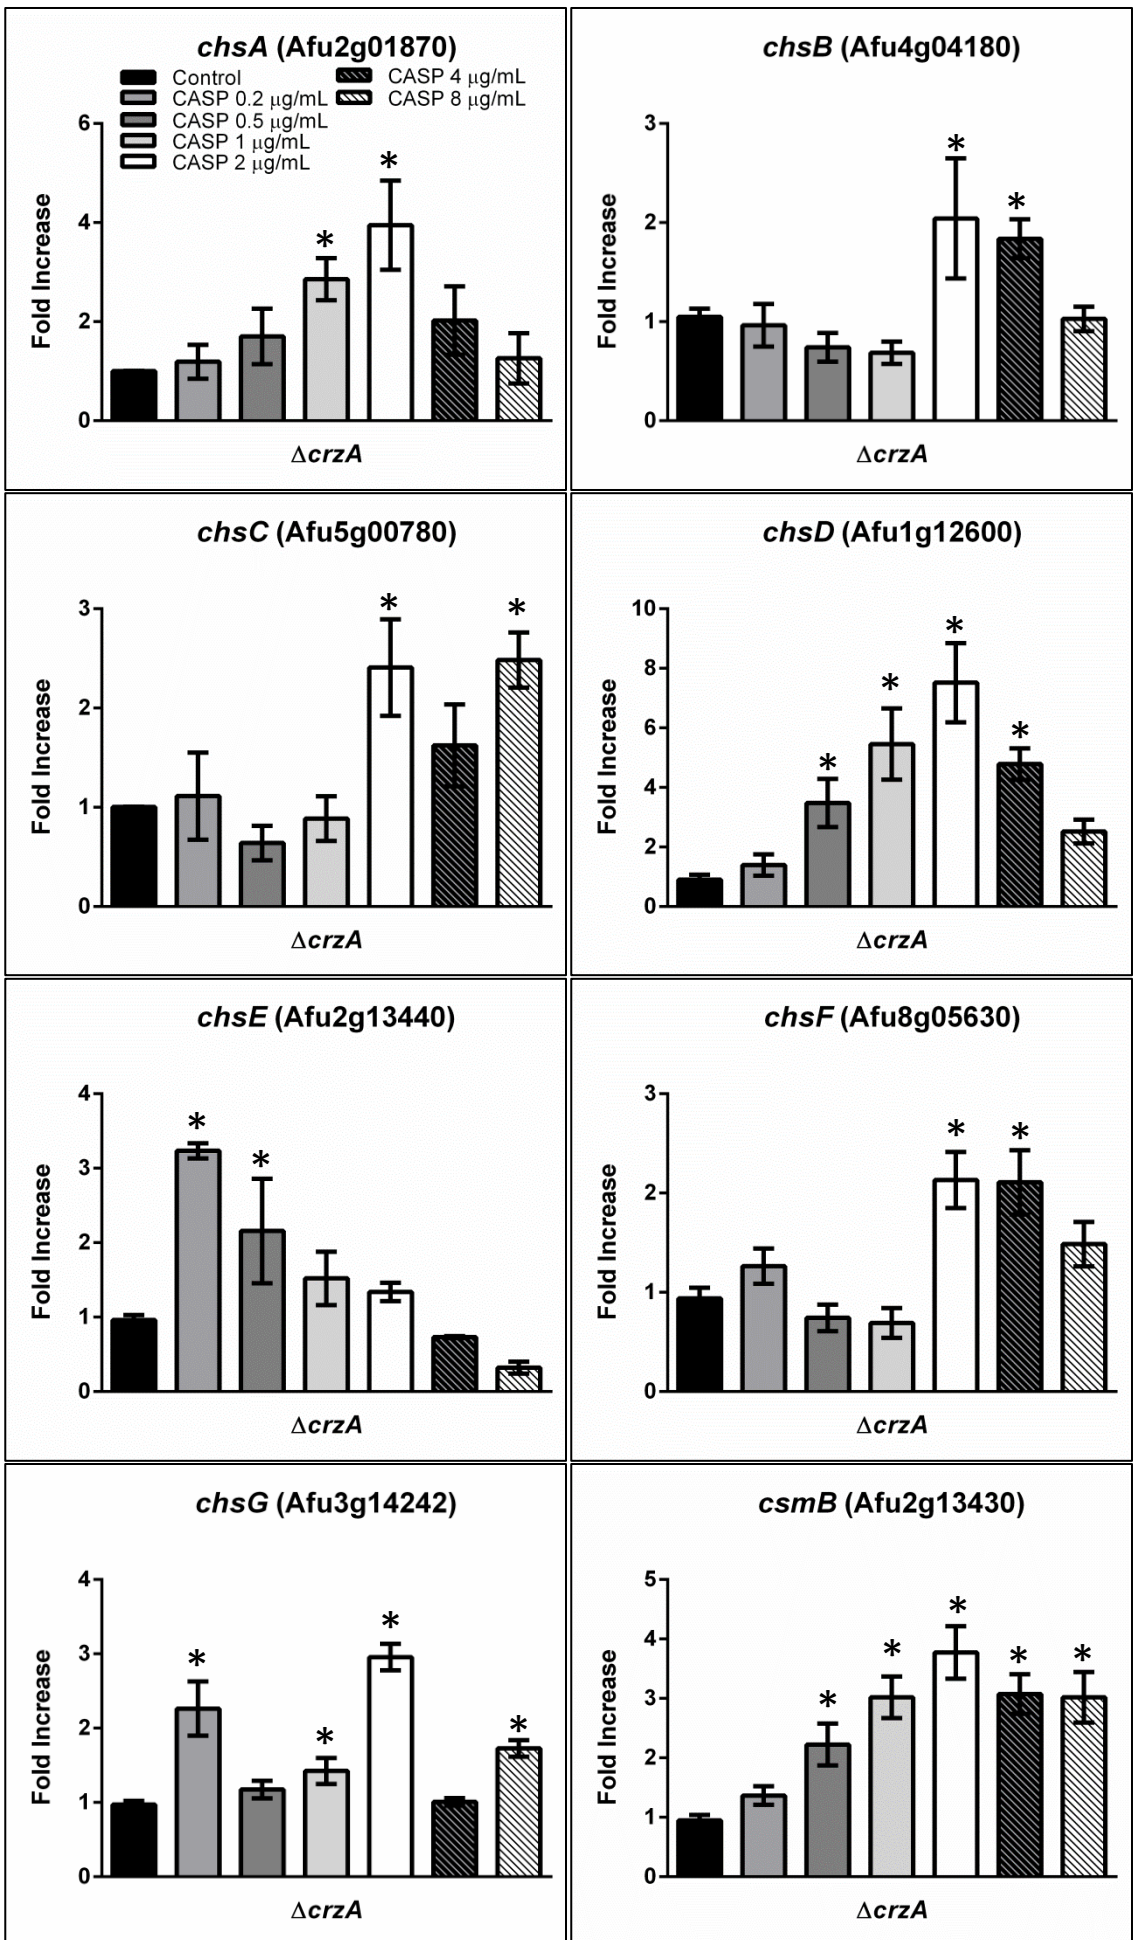



E.

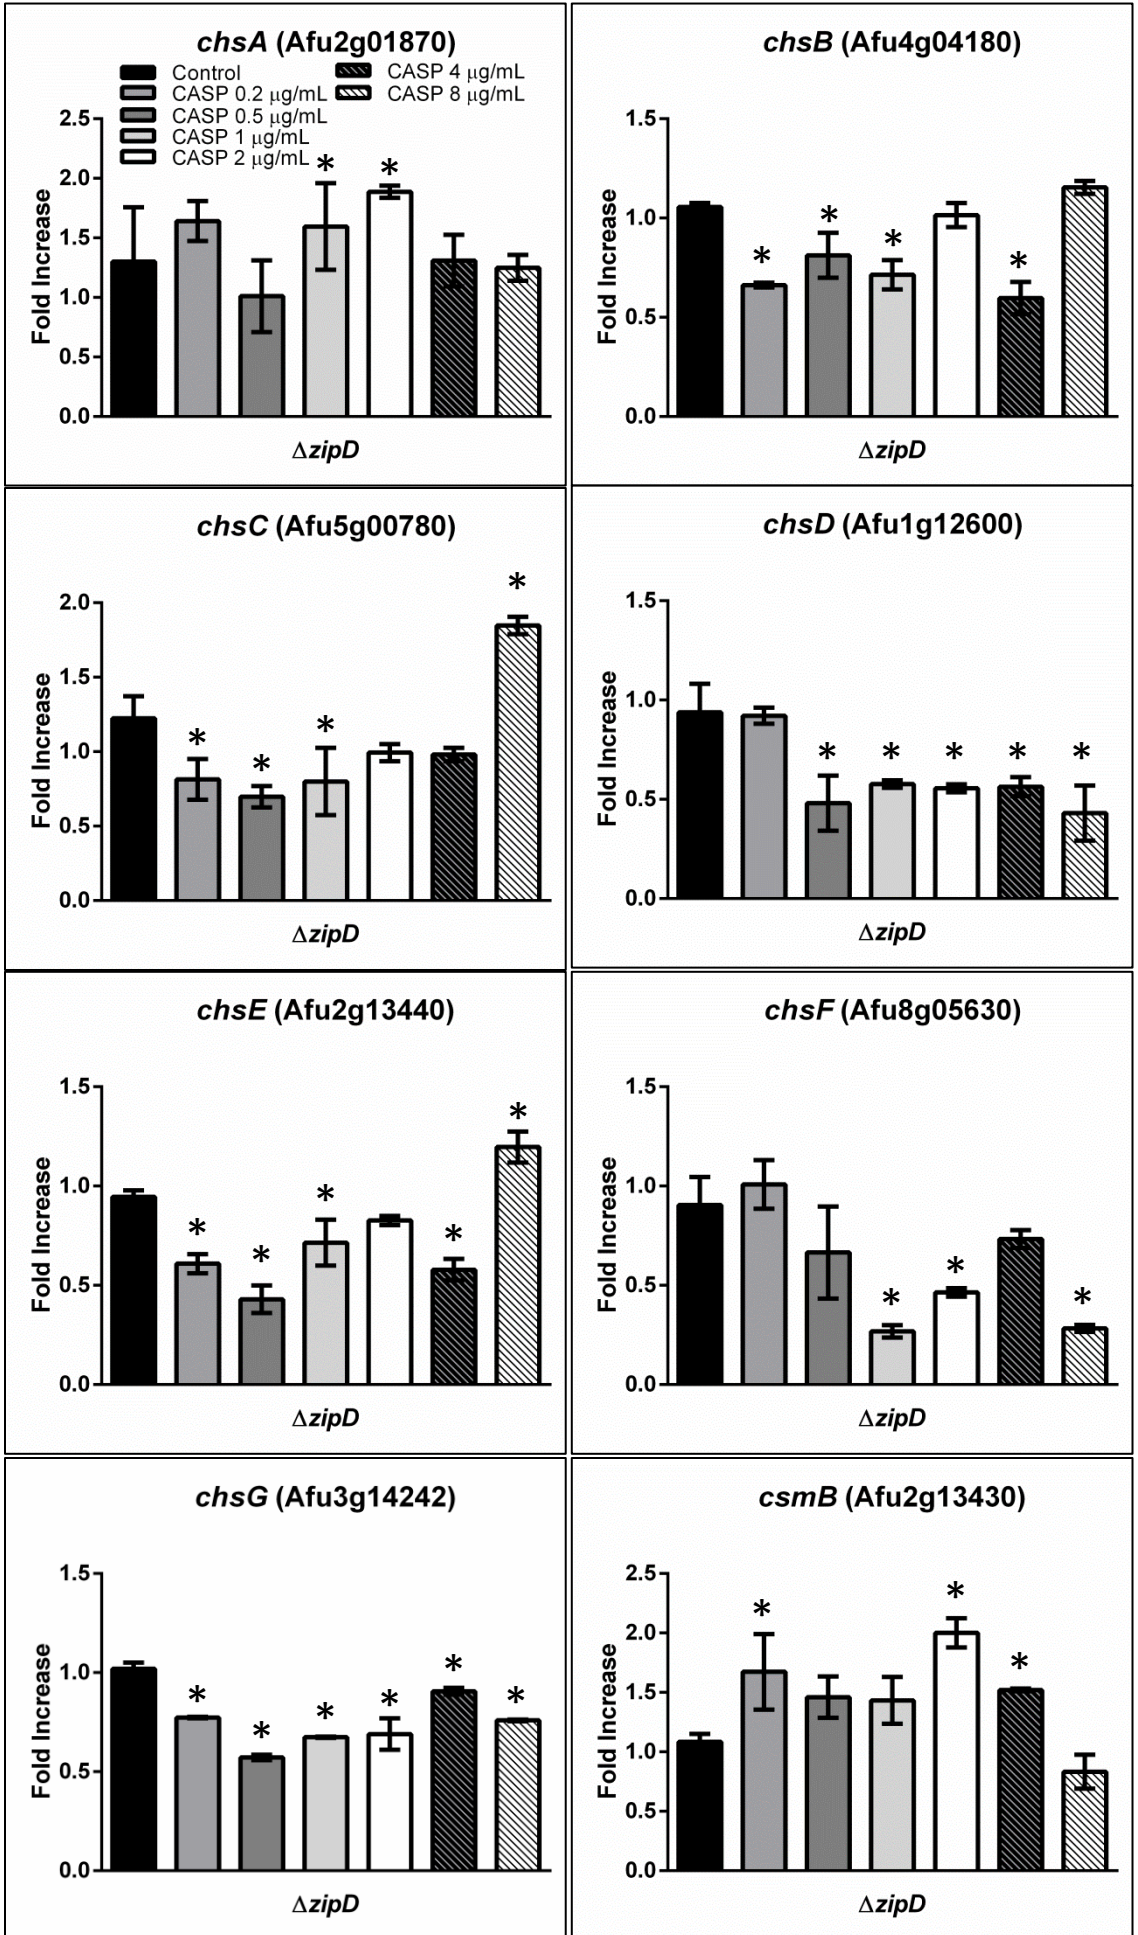

Supplement: mbo003173337sf1.pdf [file mbo003173337sf1.pdf]
