# Supplementary material for: The Aspergillus fumigatus CrzA Transcription Factor Activates Chitin Synthase Gene Expression during the Caspofungin Paradoxical Effect
Source: PubMed Central journal article supplement (PMC5472186; doi:10.1128/mbio.00705-17), 2017-06-13
Supplement: mbo003173337st1.pdf [file mbo003173337st1.pdf]

| Consensus sequence and in which promoter region identified | Gene strand | Start | P-value  | Motif for known transcription factor                                                                 |
|------------------------------------------------------------|-------------|-------|----------|------------------------------------------------------------------------------------------------------|
| <b>1. CTCAGC[CT][AC]TC</b>                                 |             |       |          |                                                                                                      |
| <i>chsA</i>                                                | -           | 184   | 1.52e-06 |                                                                                                      |
| <i>chsB</i>                                                | -           | 172   | 3.98e-06 |                                                                                                      |
| <i>chsC</i>                                                | +           | 636   | 8.13e-07 |                                                                                                      |
| <i>chsE</i>                                                | +           | 739   | 2.45e-06 |                                                                                                      |
| <i>chsF</i>                                                | +           | 638   | 1.52e-06 |                                                                                                      |
| <i>chsG</i>                                                | -           | 467   | 8.09e-06 |                                                                                                      |
| <i>csmB</i>                                                | +           | 944   | 1.17e-05 | UNKNOWN                                                                                              |
| <b>2. CTTCC[AC]T[CA]CT</b>                                 |             |       |          |                                                                                                      |
| <i>csmB</i>                                                | +           | 454   | 9.32e-07 |                                                                                                      |
| <i>chsD</i>                                                | +           | 520   | 2.81e-06 |                                                                                                      |
| <i>chsF</i>                                                | -           | 122   | 6.30e-06 |                                                                                                      |
| <i>chsE</i>                                                | +           | 536   | 9.37e-06 |                                                                                                      |
| <i>chsC</i>                                                | -           | 505   | 9.37e-06 |                                                                                                      |
| <i>chsA</i>                                                | +           | 818   | 1.02e-05 |                                                                                                      |
| <i>chsB</i>                                                | +           | 343   | 1.16e-05 |                                                                                                      |
| <i>chsG</i>                                                | +           | 706   | 1.27e-05 | <i>SFL1</i> (MA0377.1)<br><i>GCR2</i> (MA0305.1)<br><i>HSF1</i> (MA0319.1)<br><i>GCR1</i> (MA0304.1) |

| Consensus sequence and in which promoter region identified | Gene strand | Start | P-value  | Motif for known transcription factor |
|------------------------------------------------------------|-------------|-------|----------|--------------------------------------|
| <b>3. TCA[GT]CCAC</b>                                      |             |       |          |                                      |
| <i>chsF</i>                                                | +           | 563   | 1.31e-05 |                                      |
| <i>chsD</i>                                                | +           | 184   | 1.31e-05 |                                      |
| <i>chsC</i>                                                | +           | 356   | 1.31e-05 |                                      |
| <i>chsG</i>                                                | +           | 694   | 2.80e-05 |                                      |
| <i>chsA</i>                                                | +           | 626   | 2.80e-05 |                                      |
| <i>chsE</i>                                                | -           | 832   | 4.11e-05 |                                      |
| <i>csmB</i>                                                | +           | 763   | 5.42e-05 |                                      |
| <i>chsB</i>                                                | -           | 884   | 6.73e-05 | CRZ1 (MA0285.1)                      |
| <b>4. T[TC]T[TC]CCCTTG</b>                                 |             |       |          |                                      |
| <i>chsF</i>                                                | +           | 287   | 1.07e-06 |                                      |
| <i>csmB</i>                                                | -           | 816   | 2.93e-06 |                                      |
| <i>chsG</i>                                                | +           | 898   | 2.93e-06 |                                      |
| <i>chsD</i>                                                | -           | 267   | 5.86e-06 |                                      |
| <i>chsB</i>                                                | -           | 313   | 1.00e-05 |                                      |
| <i>chsE</i>                                                | +           | 669   | 1.89e-05 |                                      |
| <i>chsA</i>                                                | +           | 248   | 1.89e-05 |                                      |
| <i>chsC</i>                                                | +           | 35    | 2.37e-05 | UNKNOWN                              |
| <b>5. TTTTT[CT]TTT</b>                                     |             |       |          |                                      |
| <i>chsG</i>                                                | +           | 746   | 6.02e-06 |                                      |
| <i>chsF</i>                                                | +           | 345   | 6.02e-06 |                                      |
| <i>chsB</i>                                                | -           | 528   | 6.02e-06 |                                      |
| <i>csmB</i>                                                | +           | 547   | 1.29e-05 |                                      |
| <i>chsE</i>                                                | +           | 472   | 1.29e-05 |                                      |
| <i>chsC</i>                                                | +           | 14    | 1.29e-05 |                                      |
| <i>chsD</i>                                                | -           | 119   | 2.49e-05 |                                      |
| <i>chsA</i>                                                | -           | 121   | 2.49e-05 | AZF1 (MA0277.1)<br>SFP1 (MA0378.1)   |

| Consensus sequence and in which promoter region identified | Gene strand | Start | P-value  | Motif for known transcription factor |
|------------------------------------------------------------|-------------|-------|----------|--------------------------------------|
| <b>6. GC[CG]G[AT]CACTC</b>                                 |             |       |          |                                      |
| <i>chsG</i>                                                | +           | 34    | 1.42e-06 |                                      |
| <i>chsF</i>                                                | +           | 274   | 1.42e-06 |                                      |
| <i>chsB</i>                                                | -           | 935   | 1.42e-06 |                                      |
| <i>chsC</i>                                                | -           | 188   | 2.84e-06 | UNKNOWN                              |
| <b>7. T[GC]TTGAT[CG]GA</b>                                 |             |       |          |                                      |
| <i>chsG</i>                                                | +           | 815   | 1.07e-06 |                                      |
| <i>chsF</i>                                                | +           | 942   | 3.20e-06 |                                      |
| <i>chsB</i>                                                | -           | 792   | 3.20e-06 |                                      |
| <i>csmB</i>                                                | -           | 805   | 6.58e-06 |                                      |
| <i>chsD</i>                                                | +           | 848   | 9.79e-06 |                                      |
| <i>chsC</i>                                                | -           | 699   | 1.53e-05 |                                      |
| <i>chsE</i>                                                | -           | 345   | 2.20e-05 |                                      |
| <i>chsA</i>                                                | -           | 968   | 3.33e-05 | UNKNOWN                              |
| <b>8. T[TC][TG][CG]CA[CG][TC]G[TG]</b>                     |             |       |          |                                      |
| <i>chsG</i>                                                | +           | 936   | 2.14e-06 |                                      |
| <i>chsE</i>                                                | +           | 777   | 5.86e-06 |                                      |
| <i>chsA</i>                                                | +           | 287   | 5.86e-06 |                                      |
| <i>csmB</i>                                                | +           | 592   | 6.93e-06 |                                      |
| <i>chsF</i>                                                | +           | 251   | 1.07e-05 |                                      |
| <i>chsC</i>                                                | +           | 165   | 1.07e-05 |                                      |
| <i>chsD</i>                                                | -           | 889   | 1.66e-05 |                                      |
| <i>chsB</i>                                                | -           | 763   | 3.67e-05 | UNKNOWN                              |
