# Supplementary material for: The Aspergillus fumigatus CrzA Transcription Factor Activates Chitin Synthase Gene Expression during the Caspofungin Paradoxical Effect
Source: PubMed Central journal article supplement (PMC5472186; doi:10.1128/mbio.00705-17), 2017-06-13
Supplement: mbo003173337st2.pdf [file mbo003173337st2.pdf]

| Strain                | Genotype                                               | Reference |
|-----------------------|--------------------------------------------------------|-----------|
| CEA17                 | <i>akuB (KU80)Δ, MAT1-1</i>                            | (1)       |
| $\Delta mpkA$         | $\Delta mpkA::pyrG, akuB (KU80)\Delta, MAT1-1$         | (2)       |
| $\Delta rlmA$         | $\Delta rlmA::pyrG, akuB (KU80)\Delta, MAT1-1$         | (3)       |
| $\Delta crzA^{CEA17}$ | $\Delta crzA::pyrG, akuB (KU80)\Delta, MAT1-1$         | (4)       |
| CrzA::GFP             | <i>CrzA::GFP::pyrG, akuB (KU80)Δ, MAT1-1</i>           | (4)       |
| $\Delta crzA::crzA^+$ | $\Delta crzA::crzA^+::pyrG, akuB (KU80)\Delta, MAT1-1$ | (4)       |
| $\Delta zipD$         | $\Delta zipD::pyrG, akuB (KU80)\Delta, MAT1-1$         | This work |
| $\Delta zipD::zipD^+$ | $\Delta zipD::zipD^+::prtA, akuB (KU80)\Delta, MAT1-1$ | This work |
| ZipD::GFP             | <i>zipD::GFP::pyrG, akuB (KU80)Δ, MAT1-1</i>           | This work |

## References

1. Da Silva Ferreira ME, Kress MR, Savoldi M, Goldman MH, Härtl A, Heinekamp T, Brakhage AA, Goldman GH. 2006. The *akuB(KU80)* mutant deficient for nonhomologous end joining is a powerful tool for analysing pathogenicity in *Aspergillus fumigatus*. *Eukaryot Cell* **5**:207-211.
2. Valiante V, Heinekamp T, Jain R, Härtl A, Brakhage AA. 2008. The mitogen-activated protein kinase MpkA of *Aspergillus fumigatus* regulates cell wall signaling and oxidative stress response. *Fungal Genet Biol* **45**:618-627.
3. Rocha MC, Fabri JH, Franco de Godoy K, Alves de Castro P, Hori JI, Ferreira da Cunha A, Arentshorst M, Ram AF, van den Hondel CA, Goldman GH, Malavazi I. 2016. *Aspergillus fumigatus* MADS-Box Transcription Factor RlmA Is Required for Regulation of the Cell Wall Integrity and Virulence. *G3* **6**:2983-3002.
4. Soriani FM, Malavazi I, da Silva Ferreira ME, Savoldi M, Von Zeska Kress MR, de Souza Goldman MH, Loss O, Bignell E, Goldman GH. 2008. Functional characterization of the *Aspergillus fumigatus* CRZ1 homologue, CrzA. *Mol Microbiol* **67**:1274-1291.
