# Supplementary material for: The Aspergillus fumigatus CrzA Transcription Factor Activates Chitin Synthase Gene Expression during the Caspofungin Paradoxical Effect
Source: PubMed Central journal article supplement (PMC5472186; doi:10.1128/mbio.00705-17), 2017-06-13
Supplement: mbo003173337st3.pdf [file mbo003173337st3.pdf]

| <b>Primer name</b> | <b>Sequence</b>                                   | <b>ORF number</b> |
|--------------------|---------------------------------------------------|-------------------|
| chsA-F             | 5'-CCGTAGACTAATTGGATG-3'                          | Afu2g01870 (chsA) |
| chsA-F             | 5'-GGCTGAGAACGGAGTAGAAA-3'                        | Afu2g01870 (chsA) |
| csmB-F             | 5'-CTTTCCTATTCCACGCTTG-3'                         | Afu2g13430 (csmB) |
| csmB-R             | 5'-CCCTTGGTGTTGAGCGAAG-3'                         | Afu2g13430 (csmB) |
| chsC-F             | 5'-GTGGCGGAGCCCGCAAAG-3'                          | Afu5g00760 (chsC) |
| chsC-R             | 5'-GAACAATCGTCAGCCAAG-3'                          | Afu5g00760 (chsC) |
| chsG-F             | 5'-GCCTCATTTGTATACCTAAG-3'                        | Afu3g14420 (chsG) |
| chsG-R             | 5'-GAAAAAAGAAAAATTACTG-3'                         | Afu3g14420 (chsG) |
| mchsA-F            | 5'-CTAAAATCCAAGAAGTGACTGCTTGTAAGCCTGCCAAGCAAAG-3' | Afu2g01870 (chsA) |
| mchsA-R            | 5'-CTTTGCTTGGCAGGCTTACAAGCAGTCACTTCTTGGATTTTAG-3' | Afu2g01870 (chsA) |
| mcsmb-F            | 5'-CCGTTTCCATTTCGTCTGATAGTAAGGTTGCCAATCAAACG-3'   | Afu2g13430 (csmB) |
| mcsmb-R            | 5'-CGTTTGATTGGCAACCTTACTATCAGACGAATGGAAACGG-3'    | Afu2g13430 (csmB) |
| mchsC-F            | 5'-GCCTTACAACGGGTGTCGCTGATTGTTGGCGGCGACAACCC-3'   | Afu5g00760 (chsC) |
| mchsC-R            | 5'-GGGTTGTCGCCGCAACAATCAGCGACACCCGTTGTAAGGC-3'    | Afu5g00760 (chsC) |
| mchsG-F            | 5'-AACATTGCCTGGCGGCTCTGCTTGTGTTTCTTCCTTACTG-3'    | Afu3g14420 (chsG) |
| mchsG-R            | 5'-CAGTAAGGAAGAAACACAAGCAGAGCCGCCAGGCAATGTT-3'    | Afu3g14420 (chsG) |
| chsA Fw            | 5'-CGTCATCAAAGTATTATTTCCCC-3'                     | Afu2g01870 (chsA) |
| chsA Rv            | 5'-TTGGCTGAGAACGGAGTA-3'                          | Afu2g01870 (chsA) |
| chsC Fw            | 5'-ACGTTTACACACACCAAAA-3'                         | Afu5g00760 (chsC) |
| chsC Rv            | 5'-GCCAAGAACCAACCAGT-3'                           | Afu5g00760 (chsC) |
| chsG Fw            | 5'-GTGGTTCGTGGGCTT-3'                             | Afu3g14420 (chsG) |
| chsG Rv            | 5'-GAAAGGCTGGTCGAGG-3'                            | Afu3g14420 (chsG) |
| csmB Fw            | 5'-TCTTTCGGCTTGTAGAAGTT-3'                        | Afu2g13430 (csmB) |
| csmB Rv            | 5'-ATTCTCTTCCCTTGGTGTTG-3'                        | Afu2g13430 (csmB) |
